# Supplementary material for: Identifying differential interactions of traumatic experiences with genetic risk for posttraumatic stress disorder
Source: Research Square preprint supplement (doi:10.21203/rs.3.rs-8320002/v1), 2026-01-08
Supplement: Supplementary file 1 [file 8faf44b9032fb5b00a75afb0.xlsx]

## Sheet: Table of Contents
Table of Contents
Supp Table 1	Phi coefficients among traumas in UK Biobank (N=108,919)
Supp Table 2	Phi coefficients among traumas in GLAD-EDGI-COPING (N=35,783)
Supp Table 3	PCL-6 scores and screening rates by cohort, sex and trauma exposure
Supp Table 4	Point-biserial correlations between trauma exposures and PCL-6 scores
Supp Table 5	PTSD PRS-trauma interaction effects
Supp Table 6	Z-score comparisons of PTSD PRS-trauma interaction effects
Supp Table 7	MDD PRS-trauma interaction effects
Supp Table 8	Z-score comparisons of MDD PRS-trauma interaction effects
Supp Table 9	Z-score comparisons of PTSD PRS-trauma interaction effects with childhood traumas as ordinal variables
Supp Table 10	PRSet gene score summary
Supp Table 11	Enrichment analyses of genes with significant vs non-significant PCL-6 score associations
Supp Table 12	Gene-trauma interaction effects
Supp Table 13	Enrichment analyses of genes with significant vs non-significant trauma interaction effects
Supp Table 14	Gene omnibus tests of childhood vs adulthood trauma
Supp Table 15	Enrichment analyses of genes with significant vs non-significant omnibus tests
Supp Table 16	SNP-trauma interaction effects
Supp Table 17	Associations between SNPs and PCL-6 scores

## Sheet: Supp 1
Supplementary Table 1
Phi coefficients among traumas in UK Biobank (N=108,919)
	Any adulthood	Serious accident	Serious illness	Sexual assault	Violent attack	War exposure	Witnessing death	Any childhood	Emotional abuse	Emotional neglect	Physical abuse	Physical neglect	Sexual abuse
Any adulthood	1	0.324604	0.430102	0.409645	0.478503	0.192413	0.389352	0.0892853	0.111988	0.0726888	0.11076	0.00199457	0.0248972
Serious accident	0.324604	1	0.0454057	0.0570663	0.137796	0.0915269	0.151646	0.0559288	0.0641325	0.0367965	0.0630811	0.00836336	0.0236159
Serious illness	0.430102	0.0454057	1	0.0300103	0.020741	0.0399142	0.0399186	0.031033	0.0286973	0.0208796	0.0252873	0.00612542	0.0210128
Sexual assault	0.409645	0.0570663	0.0300103	1	0.106683	0.0141822	0.0462815	0.131409	0.169052	0.116162	0.13887	0.0286231	0.0609929
Violent attack	0.478503	0.137796	0.020741	0.106683	1	0.0665945	0.125818	0.0542803	0.082709	0.0520929	0.08808	0.00285003	0.0046392
War exposure	0.192413	0.0915269	0.0399142	0.0141822	0.0665945	1	0.177852	0.0395224	0.027332	0.0228865	0.0473546	0.0160763	0.022281
Witnessing death	0.389352	0.151646	0.0399186	0.0462815	0.125818	0.177852	1	0.0451948	0.0505783	0.0288422	0.0742978	0.00337123	0.0147026
Any childhood	0.0892853	0.0559288	0.031033	0.131409	0.0542803	0.0395224	0.0451948	1	0.530957	0.415184	0.48878	0.287981	0.718459
Emotional abuse	0.111988	0.0641325	0.0286973	0.169052	0.082709	0.027332	0.0505783	0.530957	1	0.33431	0.37878	0.107005	0.180778
Emotional neglect	0.0726888	0.0367965	0.0208796	0.116162	0.0520929	0.0228865	0.0288422	0.415184	0.33431	1	0.257069	0.165704	0.207377
Physical abuse	0.11076	0.0630811	0.0252873	0.13887	0.08808	0.0473546	0.0742978	0.48878	0.37878	0.257069	1	0.103673	0.167292
Physical neglect	0.00199457	0.00836336	0.00612542	0.0286231	0.00285003	0.0160763	0.00337123	0.287981	0.107005	0.165704	0.103673	1	0.401484
Sexual abuse	0.0248972	0.0236159	0.0210128	0.0609929	0.0046392	0.022281	0.0147026	0.718459	0.180778	0.207377	0.167292	0.401484	1
Note. Phi coefficients were calculated as all variables were binary.

## Sheet: Supp 2
Supplementary Table 2
Phi coefficients among traumas in GLAD-EDGI-COPING (N=35,783)
	Any adulthood	Serious accident	Serious illness	Sexual assault	Violent attack	War exposure	Witnessing death	Any childhood	Emotional abuse	Emotional neglect	Physical abuse	Physical neglect	Sexual abuse
Any adulthood	1	0.296112	0.269991	0.616275	0.445125	0.129518	0.326919	0.270547	0.200772	0.183945	0.167049	0.0550845	0.312229
Serious accident	0.296112	1	0.0848957	0.0808831	0.169067	0.0947873	0.164134	0.0955252	0.0899331	0.0891874	0.110441	0.0465022	0.064433
Serious illness	0.269991	0.0848957	1	0.0268779	0.0537472	0.041491	0.0666015	0.0339512	0.0221764	0.0372091	0.0411398	0.0349764	0.0424099
Sexual assault	0.616275	0.0808831	0.0268779	1	0.133682	0.000448439	0.0786356	0.350751	0.271607	0.219773	0.184273	0.0753849	0.504712
Violent attack	0.445125	0.169067	0.0537472	0.133682	1	0.0742528	0.162342	0.132907	0.115986	0.128715	0.152524	0.0385798	0.11952
War exposure	0.129518	0.0947873	0.041491	0.000448439	0.0742528	1	0.17512	0.0189596	-0.00519631	0.022587	0.0382147	0.0258647	0.0189313
Witnessing death	0.326919	0.164134	0.0666015	0.0786356	0.162342	0.17512	1	0.0883427	0.0780092	0.0782555	0.113555	0.0379482	0.0801635
Any childhood	0.270547	0.0955252	0.0339512	0.350751	0.132907	0.0189596	0.0883427	1	0.668568	0.663602	0.419592	0.190999	0.425099
Emotional abuse	0.200772	0.0899331	0.0221764	0.271607	0.115986	-0.00519631	0.0780092	0.668568	1	0.452922	0.37963	0.119573	0.227368
Emotional neglect	0.183945	0.0891874	0.0372091	0.219773	0.128715	0.022587	0.0782555	0.663602	0.452922	1	0.353734	0.16418	0.218113
Physical abuse	0.167049	0.110441	0.0411398	0.184273	0.152524	0.0382147	0.113555	0.419592	0.37963	0.353734	1	0.158972	0.215878
Physical neglect	0.0550845	0.0465022	0.0349764	0.0753849	0.0385798	0.0258647	0.0379482	0.190999	0.119573	0.16418	0.158972	1	0.133851
Sexual abuse	0.312229	0.064433	0.0424099	0.504712	0.11952	0.0189313	0.0801635	0.425099	0.227368	0.218113	0.215878	0.133851	1
Note. Phi coefficients were calculated as all variables were binary.

## Sheet: Supp 3
Supplementary Table 3
PCL-6 scores and screening rates by cohort, sex and trauma exposure
Skip to table note
Cohort	Sex	Trauma	PCL-6 Mean	PCL-6 SD	Screening Rate
GLAD-EDGI-COPING	Combined	Sexual assault	16.3769	6.5452	0.620222
GLAD-EDGI-COPING	Combined	Violent attack	15.2833	6.74129	0.547979
GLAD-EDGI-COPING	Combined	Serious accident	15.6519	6.7743	0.568123
GLAD-EDGI-COPING	Combined	Witnessing death	15.2728	6.87181	0.534315
GLAD-EDGI-COPING	Combined	Serious illness	14.056	6.52494	0.454988
GLAD-EDGI-COPING	Combined	War exposure	13.5061	6.755	0.437805
GLAD-EDGI-COPING	Combined	Any adulthood	14.9667	6.61903	0.527347
GLAD-EDGI-COPING	Combined	Physical abuse	17.2592	6.72226	0.666472
GLAD-EDGI-COPING	Combined	Emotional abuse	17.5133	6.34958	0.699054
GLAD-EDGI-COPING	Combined	Sexual abuse	17.0046	6.73916	0.652091
GLAD-EDGI-COPING	Combined	Physical neglect	16.5666	7.53397	0.607113
GLAD-EDGI-COPING	Combined	Emotional neglect	16.417	6.56384	0.624127
GLAD-EDGI-COPING	Combined	Any childhood	16.0107	6.51927	0.60206
GLAD-EDGI-COPING	Combined	Any trauma	14.9059	6.54518	0.526511
GLAD-EDGI-COPING	Female	Sexual assault	16.355	6.48402	0.619816
GLAD-EDGI-COPING	Female	Violent attack	16.3012	6.74651	0.608599
GLAD-EDGI-COPING	Female	Serious accident	16.498	6.65201	0.624386
GLAD-EDGI-COPING	Female	Witnessing death	16.4465	6.73221	0.601565
GLAD-EDGI-COPING	Female	Serious illness	14.8057	6.43796	0.497976
GLAD-EDGI-COPING	Female	War exposure	14.8968	6.65582	0.528024
GLAD-EDGI-COPING	Female	Any adulthood	15.5965	6.51291	0.568441
GLAD-EDGI-COPING	Female	Physical abuse	17.6202	6.59188	0.688071
GLAD-EDGI-COPING	Female	Emotional abuse	17.5827	6.29027	0.703527
GLAD-EDGI-COPING	Female	Sexual abuse	17.1188	6.67855	0.659112
GLAD-EDGI-COPING	Female	Physical neglect	17.3058	7.39557	0.653488
GLAD-EDGI-COPING	Female	Emotional neglect	16.7747	6.4683	0.647284
GLAD-EDGI-COPING	Female	Any childhood	16.3243	6.42283	0.622869
GLAD-EDGI-COPING	Female	Any trauma	15.4586	6.44243	0.563135
GLAD-EDGI-COPING	Male	Sexual assault	15.1183	6.59739	0.545
GLAD-EDGI-COPING	Male	Violent attack	13.6033	6.33795	0.447961
GLAD-EDGI-COPING	Male	Serious accident	13.8602	6.5695	0.452294
GLAD-EDGI-COPING	Male	Witnessing death	13.073	6.49694	0.407643
GLAD-EDGI-COPING	Male	Serious illness	12.1585	6.22657	0.345401
GLAD-EDGI-COPING	Male	War exposure	12.3819	6.55823	0.367089
GLAD-EDGI-COPING	Male	Any adulthood	12.6794	6.23406	0.38186
GLAD-EDGI-COPING	Male	Physical abuse	15.4944	6.74168	0.569599
GLAD-EDGI-COPING	Male	Emotional abuse	16.0935	6.37067	0.621203
GLAD-EDGI-COPING	Male	Sexual abuse	15.4653	6.74156	0.563565
GLAD-EDGI-COPING	Male	Physical neglect	13.7323	7.18745	0.435484
GLAD-EDGI-COPING	Male	Emotional neglect	14.5725	6.43826	0.511767
GLAD-EDGI-COPING	Male	Any childhood	14.1148	6.39701	0.482537
GLAD-EDGI-COPING	Male	Any trauma	12.6687	6.18109	0.381906
UKB	Combined	Sexual assault	9.29017	4.01215	0.215857
UKB	Combined	Violent attack	8.67219	3.66607	0.189063
UKB	Combined	Serious accident	8.91963	3.8117	0.200955
UKB	Combined	Witnessing death	8.70947	3.64644	0.180279
UKB	Combined	Serious illness	8.48933	3.44969	0.165579
UKB	Combined	War exposure	8.49914	3.47607	0.15971
UKB	Combined	Any adulthood	8.43819	3.40816	0.162073
UKB	Combined	Physical abuse	9.84154	4.4603	0.273702
UKB	Combined	Emotional abuse	10.5539	4.6829	0.311723
UKB	Combined	Sexual abuse	8.85801	3.90441	0.212585
UKB	Combined	Physical neglect	9.32297	4.49429	0.263566
UKB	Combined	Emotional neglect	10.4634	4.76311	0.331761
UKB	Combined	Any childhood	9.08117	3.96479	0.224856
UKB	Combined	Any trauma	8.38444	3.37371	0.161981
UKB	Female	Sexual assault	9.40288	4.02852	0.214669
UKB	Female	Violent attack	9.06572	3.87855	0.200363
UKB	Female	Serious accident	9.5264	4.09738	0.230031
UKB	Female	Witnessing death	9.42072	4.00794	0.211038
UKB	Female	Serious illness	8.86526	3.6667	0.173394
UKB	Female	War exposure	9.03531	3.63624	0.176642
UKB	Female	Any adulthood	8.84501	3.62591	0.175624
UKB	Female	Physical abuse	10.2798	4.565	0.284278
UKB	Female	Emotional abuse	10.7259	4.70859	0.31312
UKB	Female	Sexual abuse	9.20417	4.03421	0.219064
UKB	Female	Physical neglect	9.84723	4.67862	0.271259
UKB	Female	Emotional neglect	10.9209	4.85646	0.341152
UKB	Female	Any childhood	9.43252	4.09133	0.233377
UKB	Female	Any trauma	8.76465	3.57169	0.174293
UKB	Male	Sexual assault	8.90807	3.93272	0.220655
UKB	Male	Violent attack	8.37415	3.46714	0.178325
UKB	Male	Serious accident	8.5118	3.5495	0.175736
UKB	Male	Witnessing death	8.27872	3.3362	0.155072
UKB	Male	Serious illness	8.08174	3.1477	0.154289
UKB	Male	War exposure	8.31339	3.39978	0.152074
UKB	Male	Any adulthood	8.01098	3.10664	0.143084
UKB	Male	Physical abuse	9.27846	4.2569	0.25648
UKB	Male	Emotional abuse	10.1851	4.60646	0.308333
UKB	Male	Sexual abuse	8.36126	3.65362	0.200183
UKB	Male	Physical neglect	8.63809	4.14425	0.249206
UKB	Male	Emotional neglect	9.7843	4.53766	0.314231
UKB	Male	Any childhood	8.58236	3.7215	0.209171
UKB	Male	Any trauma	7.95321	3.07779	0.143252
Combined	Combined	Sexual assault	11.0426	3.73388	0.315851
Combined	Combined	Violent attack	10.307	3.49476	0.459224
Combined	Combined	Serious accident	10.5844	3.60798	0.477327
Combined	Combined	Witnessing death	10.3325	3.49422	0.446766
Combined	Combined	Serious illness	9.86589	3.3083	0.383421
Combined	Combined	War exposure	9.7373	3.35324	0.369035
Combined	Combined	Any adulthood	10.0526	3.28729	0.437019
Combined	Combined	Physical abuse	11.6758	4.09051	0.569345
Combined	Combined	Emotional abuse	12.2749	4.21743	0.603272
Combined	Combined	Sexual abuse	10.8726	3.67393	0.543407
Combined	Combined	Physical neglect	11.1142	4.20463	0.522158
Combined	Combined	Emotional neglect	11.9357	4.30117	0.551829
Combined	Combined	Any childhood	10.7948	3.6954	0.508782
Combined	Combined	Any trauma	9.9971	3.25331	0.436368
Combined	Female	Sexual assault	11.1221	3.73953	0.519628
Combined	Female	Violent attack	10.855	3.65527	0.507647
Combined	Female	Serious accident	11.2504	3.80968	0.526867
Combined	Female	Witnessing death	11.1581	3.75111	0.504993
Combined	Female	Serious illness	10.3343	3.46215	0.417711
Combined	Female	War exposure	10.4848	3.46299	0.441131
Combined	Female	Any adulthood	10.5146	3.43963	0.471302
Combined	Female	Physical abuse	12.095	4.1551	0.588218
Combined	Female	Emotional abuse	12.4215	4.23029	0.606984
Combined	Female	Sexual abuse	11.1614	3.76502	0.550293
Combined	Female	Physical neglect	11.6916	4.32828	0.558968
Combined	Female	Emotional neglect	12.3685	4.36101	0.571581
Combined	Female	Any childhood	11.1368	3.78013	0.526552
Combined	Female	Any trauma	10.42	3.39112	0.466979
Combined	Male	Sexual assault	10.4438	3.67978	0.464794
Combined	Male	Violent attack	9.66725	3.30103	0.381283
Combined	Male	Serious accident	9.83439	3.38828	0.383905
Combined	Male	Witnessing death	9.46428	3.21981	0.345186
Combined	Male	Serious illness	9.08987	3.04844	0.298141
Combined	Male	War exposure	9.31947	3.27435	0.313918
Combined	Male	Any adulthood	9.16542	3.01835	0.322814
Combined	Male	Physical abuse	10.8156	3.93953	0.492168
Combined	Male	Emotional abuse	11.6462	4.16218	0.543834
Combined	Male	Sexual abuse	10.118	3.48542	0.473705
Combined	Male	Physical neglect	9.89781	3.90336	0.38942
Combined	Male	Emotional neglect	10.9684	4.11777	0.462919
Combined	Male	Any childhood	9.95047	3.49893	0.414937
Combined	Male	Any trauma	9.11929	2.99085	0.322889
Note. Combined sample PCL-6 standard deviations are pooled based on sample size. PTSD screening was based on a PCL-6 cutoff of 14.

## Sheet: Supp 4
Supplementary Table 4
Point-biserial correlations between trauma exposures and PCL-6 scores
Cohort	Trauma	Correlation
GLAD-EDGI-COPING	Sexual assault	0.306004
GLAD-EDGI-COPING	Violent attack	0.128285
GLAD-EDGI-COPING	Serious accident	0.106098
GLAD-EDGI-COPING	Witnessing death	0.0935021
GLAD-EDGI-COPING	Serious illness	0.0147616
GLAD-EDGI-COPING	War exposure	0.0064458
GLAD-EDGI-COPING	Any adulthood	0.228083
GLAD-EDGI-COPING	Physical abuse	0.230172
GLAD-EDGI-COPING	Emotional abuse	0.393865
GLAD-EDGI-COPING	Sexual abuse	0.216204
GLAD-EDGI-COPING	Physical neglect	0.0837568
GLAD-EDGI-COPING	Emotional neglect	0.275924
GLAD-EDGI-COPING	Any childhood	0.351669
UKB	Sexual assault	0.179124
UKB	Violent attack	0.108002
UKB	Serious accident	0.099622
UKB	Witnessing death	0.0927096
UKB	Serious illness	0.0713123
UKB	War exposure	0.0322213
UKB	Any adulthood	0.15823
UKB	Physical abuse	0.179835
UKB	Emotional abuse	0.270069
UKB	Sexual abuse	0.123196
UKB	Physical neglect	0.076062
UKB	Emotional neglect	0.204054
UKB	Any childhood	0.216964

## Sheet: Supp 5
Supplementary Table 5
PTSD PRS-trauma interaction effects
Skip to table note
Cohort	Trauma	Beta	SE	z	p	FDR p
GLAD-EDGI-COPING	Sexual assault	0.0350672	0.0647932	0.541218	0.588358	0.611892
GLAD-EDGI-COPING	Violent attack	0.183169	0.0726313	2.5219	0.0116722	0.0151738
GLAD-EDGI-COPING	Serious accident	0.0787779	0.0956974	0.823198	0.410395	0.435522
GLAD-EDGI-COPING	Witnessing death	0.127824	0.0875367	1.46024	0.144225	0.178564
GLAD-EDGI-COPING	Serious illness	0.178996	0.102947	1.73872	0.0820847	0.104107
GLAD-EDGI-COPING	War exposure	-0.0366887	0.207125	-0.177133	0.859404	0.859404
GLAD-EDGI-COPING	Any adulthood	0.17489	0.0626499	2.79154	0.00524581	0.0073725
GLAD-EDGI-COPING	Physical abuse	0.0160007	0.0846576	0.189005	0.850089	0.859404
GLAD-EDGI-COPING	Emotional abuse	0.171067	0.0663341	2.57887	0.00991234	0.0132165
GLAD-EDGI-COPING	Sexual abuse	0.119888	0.0845885	1.41732	0.156391	0.189124
GLAD-EDGI-COPING	Physical neglect	0.420081	0.162868	2.57927	0.00990097	0.0132165
GLAD-EDGI-COPING	Emotional neglect	0.25266	0.0662196	3.81549	0.000135914	0.000235584
GLAD-EDGI-COPING	Any childhood	0.275547	0.062397	4.41603	1.00529e-05	1.86696e-05
UKB	Sexual assault	0.325192	0.0304543	10.678	1.28967e-26	1.37895e-25
UKB	Violent attack	0.237328	0.0276357	8.58771	8.87197e-18	3.07562e-17
UKB	Serious accident	0.2142	0.036509	5.86703	4.43664e-09	1.15353e-08
UKB	Witnessing death	0.157329	0.032229	4.88159	1.05232e-06	2.10464e-06
UKB	Serious illness	0.0849782	0.0297352	2.85784	0.00426542	0.00616116
UKB	War exposure	0.0640702	0.0597447	1.0724	0.28354	0.320523
UKB	Any adulthood	0.193532	0.021829	8.86583	7.59395e-19	2.82061e-18
UKB	Physical abuse	0.288845	0.0399312	7.23357	4.70449e-13	1.35907e-12
UKB	Emotional abuse	0.327813	0.0368007	8.90778	5.20635e-19	2.08254e-18
UKB	Sexual abuse	0.252223	0.0297607	8.47504	2.34995e-17	7.63735e-17
UKB	Physical neglect	0.685398	0.06547	10.4689	1.20053e-25	1.04046e-24
UKB	Emotional neglect	0.187999	0.0461983	4.06938	4.71377e-05	8.45228e-05
UKB	Any childhood	0.282448	0.0244517	11.5513	7.27096e-31	1.2603e-29
Meta-analysis	Sexual assault	0.272695	0.0275616	9.89402	4.4193e-23	3.28291e-22
Meta-analysis	Violent attack	0.230478	0.0258292	8.92318	4.53103e-19	1.96345e-18
Meta-analysis	Serious accident	0.196994	0.034111	5.77509	7.6913e-09	1.90451e-08
Meta-analysis	Witnessing death	0.153807	0.0302443	5.08549	3.66679e-07	7.62692e-07
Meta-analysis	Serious illness	0.0922179	0.0285674	3.22809	0.00124622	0.00190598
Meta-analysis	War exposure	0.0563309	0.0574043	0.9813	0.326445	0.353648
Meta-analysis	Any adulthood	0.191514	0.0206135	9.29067	1.53317e-20	8.85834e-20
Meta-analysis	Physical abuse	0.23919	0.0361153	6.62295	3.52094e-11	9.63626e-11
Meta-analysis	Emotional abuse	0.290924	0.0321802	9.04044	1.56037e-19	8.11392e-19
Meta-analysis	Sexual abuse	0.237647	0.0280738	8.46506	2.56028e-17	7.83143e-17
Meta-analysis	Physical neglect	0.648489	0.0607458	10.6755	1.32591e-26	1.37895e-25
Meta-analysis	Emotional neglect	0.209167	0.0378889	5.52055	3.37936e-08	7.64029e-08
Meta-analysis	Any childhood	0.28153	0.022766	12.3662	3.98131e-35	1.03514e-33
Note. PRS were calculated using PRS-CS (default parameters) with PGC 2024 PTSD summary statistics excluding UKB. Black text indicates an effect had a false discovery rate (FDR) adjusted p-value of <0.05, while grey text indicates it did not.

## Sheet: Supp 6
Supplementary Table 6
Z-score comparisons of PTSD PRS-trauma interaction effects
	Sexual assault	Violent attack	Serious accident	Witnessing death	Serious illness	War exposure	Any adulthood	Physical abuse	Emotional abuse	Sexual abuse	Physical neglect	Emotional neglect	Any childhood
Sexual assault	0	1.02426	0.11572	-1.47841	-2.64454	-2.05174	0.278246	-0.900417	1.60721	1.03831	4.8522	1.91975	2.28921
Violent attack	-1.02426	0	-0.773453	-2.44922	-3.63649	-2.65663	-0.858862	-1.78493	0.662898	0.0641831	4.29168	1.03872	1.19325
Serious accident	-0.11572	0.773453	0	-1.41839	-2.44671	-2.02224	0.110854	-0.913428	1.31075	0.800582	4.54899	1.6161	1.849
Witnessing death	1.47841	2.44922	1.41839	0	-1.08492	-1.09599	1.875	0.435288	2.9125	2.40491	5.62229	3.13946	3.28254
Serious illness	2.64454	3.63649	2.44671	1.08492	0	-0.397011	3.15986	1.44282	4.02596	3.53961	6.32246	4.18854	4.63329
War exposure	2.05174	2.65663	2.02224	1.09599	0.397011	0	2.27445	1.35534	2.98834	2.64914	5.38168	3.17675	3.34432
Any adulthood	-0.278246	0.858862	-0.110854	-1.875	-3.15986	-2.27445	0	-1.20285	1.5037	0.878218	4.8616	1.83995	1.86803
Physical abuse	0.900417	1.78493	0.913428	-0.435288	-1.44282	-1.35534	1.20285	0	2.26109	1.77561	5.15948	2.5163	2.88359
Emotional abuse	-1.60721	-0.662898	-1.31075	-2.9125	-4.02596	-2.98834	-1.5037	-2.26109	0	-0.574593	3.7968	0.39537	0.130721
Sexual abuse	-1.03831	-0.0641831	-0.800582	-2.40491	-3.53961	-2.64914	-0.878218	-1.77561	0.574593	0	4.1851	0.943208	0.823646
Physical neglect	-4.8522	-4.29168	-4.54899	-5.62229	-6.32246	-5.38168	-4.8616	-5.15948	-3.7968	-4.1851	0	-3.44883	-3.67146
Emotional neglect	-1.91975	-1.03872	-1.6161	-3.13946	-4.18854	-3.17675	-1.83995	-2.5163	-0.39537	-0.943208	3.44883	0	-0.0185085
Any childhood	-2.21006	-1.2299	-1.75835	-3.45382	-4.6029	-3.08838	-2.27769	-2.62084	-0.157152	-1.06185	4.05099	0.434987	0
Note. Results based on meta-analysed PTSD PRS-trauma interaction effects (Supplementary Table 5). A positive z-score indicates that the trauma on the x-axis (top) had a greater interaction effect than the trauma on the y-axis (left). Black text indicates a z-score had a false discovery rate (FDR) adjusted p-value of <0.05, while grey text indicates it did not.

## Sheet: Supp 7
Supplementary Table 7
MDD PRS-trauma interaction effects
Skip to table note
Cohort	Trauma	Beta	SE	z	p	FDR p
GLAD-EDGI-COPING	Sexual assault	-0.0121733	0.064792	-0.187883	0.850968	0.867654
GLAD-EDGI-COPING	Violent attack	0.114619	0.0729661	1.57085	0.116217	0.159034
GLAD-EDGI-COPING	Serious accident	0.0978518	0.0959505	1.01981	0.307816	0.347966
GLAD-EDGI-COPING	Witnessing death	0.0709817	0.08833	0.803596	0.42163	0.456766
GLAD-EDGI-COPING	Serious illness	0.294833	0.102403	2.87913	0.0039877	0.00648001
GLAD-EDGI-COPING	War exposure	0.0111031	0.200116	0.0554834	0.955753	0.955753
GLAD-EDGI-COPING	Any adulthood	0.095873	0.0623345	1.53804	0.124038	0.165385
GLAD-EDGI-COPING	Physical abuse	0.0417505	0.0838315	0.498029	0.618464	0.649226
GLAD-EDGI-COPING	Emotional abuse	0.131896	0.0662353	1.99132	0.0464456	0.0670881
GLAD-EDGI-COPING	Sexual abuse	0.107688	0.0847755	1.27027	0.203987	0.252556
GLAD-EDGI-COPING	Physical neglect	0.0802246	0.163781	0.489828	0.624256	0.649226
GLAD-EDGI-COPING	Emotional neglect	0.155312	0.0664055	2.33884	0.0193438	0.0287393
GLAD-EDGI-COPING	Any childhood	0.209205	0.0620042	3.37405	0.000740715	0.00132818
UKB	Sexual assault	0.325192	0.0304543	10.678	1.28967e-26	2.23542e-25
UKB	Violent attack	0.237328	0.0276357	8.58771	8.87197e-18	3.55926e-17
UKB	Serious accident	0.2142	0.036509	5.86703	4.43664e-09	1.28169e-08
UKB	Witnessing death	0.157329	0.032229	4.88159	1.05232e-06	2.73603e-06
UKB	Serious illness	0.0849782	0.0297352	2.85784	0.00426542	0.00672126
UKB	War exposure	0.0640702	0.0597447	1.0724	0.28354	0.342885
UKB	Any adulthood	0.193532	0.021829	8.86583	7.59395e-19	3.94886e-18
UKB	Physical abuse	0.288845	0.0399312	7.23357	4.70449e-13	1.52896e-12
UKB	Emotional abuse	0.327813	0.0368007	8.90778	5.20635e-19	3.38413e-18
UKB	Sexual abuse	0.252223	0.0297607	8.47504	2.34995e-17	8.7284e-17
UKB	Physical neglect	0.685398	0.06547	10.4689	1.20053e-25	1.56068e-24
UKB	Emotional neglect	0.187999	0.0461983	4.06938	4.71377e-05	9.80465e-05
UKB	Any childhood	0.282448	0.0244517	11.5513	7.27096e-31	1.89045e-29
Meta-analysis	Sexual assault	0.264145	0.0275615	9.58384	9.35013e-22	8.10345e-21
Meta-analysis	Violent attack	0.221933	0.0258442	8.58737	8.89816e-18	3.55926e-17
Meta-analysis	Serious accident	0.199485	0.0341224	5.84617	5.03023e-09	1.37669e-08
Meta-analysis	Witnessing death	0.147184	0.0302766	4.86131	1.16609e-06	2.7562e-06
Meta-analysis	Serious illness	0.101297	0.0285557	3.54734	0.000389149	0.000722706
Meta-analysis	War exposure	0.0597355	0.0572478	1.04346	0.296737	0.342897
Meta-analysis	Any adulthood	0.182864	0.0206022	8.87592	6.93549e-19	3.94886e-18
Meta-analysis	Physical abuse	0.24315	0.0360504	6.74473	1.53309e-11	4.68946e-11
Meta-analysis	Emotional abuse	0.281599	0.0321689	8.75377	2.06334e-18	9.75397e-18
Meta-analysis	Sexual abuse	0.236365	0.0280807	8.41737	3.85032e-17	1.33478e-16
Meta-analysis	Physical neglect	0.602019	0.0607928	9.9028	4.04787e-23	4.20979e-22
Meta-analysis	Emotional neglect	0.177338	0.0379236	4.67619	2.9225e-06	6.33209e-06
Meta-analysis	Any childhood	0.272591	0.0227468	11.9837	4.32544e-33	2.24923e-31
Note. PRS were calculated using PRS-CS (default parameters) with PGC 2025 MDD summary statistics excluding UKB. Black text indicates an effect had a false discovery rate (FDR) adjusted p-value of <0.05, while grey text indicates it did not.

## Sheet: Supp 8
Supplementary Table 8
Z-score comparisons of MDD PRS-trauma interaction effects
	Sexual assault	Violent attack	Serious accident	Witnessing death	Serious illness	War exposure	Any adulthood	Physical abuse	Emotional abuse	Sexual abuse	Physical neglect	Emotional neglect	Any childhood
Sexual assault	0	-1.11721	-1.47413	-2.85669	-4.10331	-3.21717	-2.3621	-0.462656	0.412038	-0.706024	5.06187	-1.85164	0.236344
Violent attack	1.11721	0	-0.524431	-1.87779	-3.13227	-2.58231	-1.1821	0.478316	1.44594	0.378162	5.7538	-0.971735	1.47137
Serious accident	1.47413	0.524431	0	-1.1465	-2.20676	-2.0969	-0.416998	0.87966	1.75101	0.834558	5.77404	-0.43413	1.78267
Witnessing death	2.85669	1.87779	1.1465	0	-1.10258	-1.35033	0.974284	2.03846	3.04273	2.15966	6.69712	0.621383	3.31156
Serious illness	4.10331	3.13227	2.20676	1.10258	0	-0.649649	2.31647	3.08446	4.19166	3.37256	7.45506	1.60181	4.69195
War exposure	3.21717	2.58231	2.0969	1.35033	0.649649	0	2.02373	2.7111	3.37862	2.77006	6.49403	1.71259	3.45537
Any adulthood	2.3621	1.1821	0.416998	-0.974284	-2.31647	-2.02373	0	1.45191	2.58466	1.53617	6.53002	-0.128035	2.92367
Physical abuse	0.462656	-0.478316	-0.87966	-2.03846	-3.08446	-2.7111	-1.45191	0	0.795784	-0.148475	5.07751	-1.25777	0.690666
Emotional abuse	-0.412038	-1.44594	-1.75101	-3.04273	-4.19166	-3.37862	-2.58466	-0.795784	0	-1.05933	4.65865	-2.09656	-0.228649
Sexual abuse	0.706024	-0.378162	-0.834558	-2.15966	-3.37256	-2.77006	-1.53617	0.148475	1.05933	0	5.46038	-1.25089	1.00243
Physical neglect	-5.06187	-5.7538	-5.77404	-6.69712	-7.45506	-6.49403	-6.53002	-5.07751	-4.65865	-5.46038	0	-5.92702	-5.07522
Emotional neglect	1.85164	0.971735	0.43413	-0.621383	-1.60181	-1.71259	0.128035	1.25777	2.09656	1.25089	5.92702	0	2.15395
Any childhood	-0.236344	-1.47137	-1.78267	-3.31156	-4.69195	-3.45537	-2.92367	-0.690666	0.228649	-1.00243	5.07522	-2.15395	0
Note. Results based on meta-analysis of MDD PRS-trauma interaction effects (Supplementary Table 7). A positive z-score indicates that the trauma on the x-axis (top) had a greater interaction effect than the trauma on the y-axis (left). Black text indicates a z-score had a false discovery rate (FDR) adjusted p-value of <0.05, while grey text indicates it did not.

## Sheet: Supp 9
Supplementary Table 9
Z-score comparisons of PTSD PRS-trauma interaction effects with childhood traumas as ordinal variables
	Sexual assault	Violent attack	Serious accident	Witnessing death	Serious illness	War exposure	Any adulthood	Physical abuse	Emotional abuse	Sexual abuse	Physical neglect	Emotional neglect
Sexual assault	0	1.02426	0.11572	-1.47841	-2.64454	-2.05174	0.278246	-0.919986	1.64245	0.855568	4.7947	1.99896
Violent attack	-1.02426	0	-0.773453	-2.44922	-3.63649	-2.65663	-0.858862	-1.63863	0.634651	0.157149	4.11092	0.794977
Serious accident	-0.11572	0.773453	0	-1.41839	-2.44671	-2.02224	0.110854	-0.841169	1.15818	0.742836	4.7658	1.39026
Witnessing death	1.47841	2.44922	1.41839	0	-1.08492	-1.09599	1.875	0.490679	2.84507	2.30177	5.59717	3.33628
Serious illness	2.64454	3.63649	2.44671	1.08492	0	-0.397011	3.15986	1.52601	4.14328	3.42391	6.15783	3.99065
War exposure	2.05174	2.65663	2.02224	1.09599	0.397011	0	2.27445	1.38019	2.86286	2.43784	5.55546	2.98275
Any adulthood	-0.278246	0.858862	-0.110854	-1.875	-3.15986	-2.27445	0	-1.10452	1.33486	0.94086	4.86474	2.02266
Physical abuse	0.803449	1.7421	0.677549	-0.526922	-1.63043	-1.31275	1.09443	0	2.2357	1.61271	5.27974	2.65395
Emotional abuse	-1.41727	-0.476249	-1.13221	-2.70836	-4.03498	-2.88429	-1.67009	-2.46457	0	-0.817296	3.64899	0.640781
Sexual abuse	-0.821857	-0.293055	-0.640539	-2.41055	-3.77354	-2.48231	-0.921516	-1.63322	0.580662	0	4.37367	1.17143
Physical neglect	-4.81707	-4.4986	-4.58004	-5.83578	-6.27539	-5.59748	-5.03094	-5.02955	-3.75077	-4.33608	0	-3.30774
Emotional neglect	-1.73894	-0.976444	-1.82248	-3.17255	-4.42825	-3.27667	-2.0683	-2.55393	-0.457315	-0.839463	3.61594	0
Note. Results based on meta-analysed PTSD PRS-trauma interaction effects. A positive z-score indicates that the trauma on the x-axis (top) had a greater interaction effect than the trauma on the y-axis (left). Black text indicates a z-score had a false discovery rate (FDR) adjusted p-value of <0.05, while grey text indicates it did not. The "Any childhood" variable included in Supplementary Table…

[truncated: 8 more sheets: Supp 10, Supp 11, Supp 12, Supp 13, Supp 14, Supp 15, Supp 16, Supp 17]
